1 Anaerobic degradation of acid red 73 by obligately aerobic *Aspergillus tabacinus*

2 LZ-M through a self-redox mechanism

3 Xuan Yu<sup>1</sup>, Simin Zong<sup>1</sup>, Chunlan Mao<sup>1\*</sup>, Aman Khan<sup>1</sup>, Wenxue Wang<sup>1</sup>, Hui Yun<sup>1</sup>,

4 Peng Zhang<sup>2</sup>, Xiangkai Li<sup>1\*</sup>

5 1. Ministry of Education Key Laboratory of Cell Activities and Stress

6 Adaptations, School of Life Sciences, Lanzhou University, Tianshui South Road #222,

7 Lanzhou 730000, Gansu, China

8 2. Key Laboratory for Resources Utilization Technology of Unconventional

9 Water of Gansu province, Gansu Academy of Membrane Science and Technology,

10 Duanjiatanlu #1272, Lanzhou 730020, Gansu, China

11 **\*Corresponding Author**

12 E-mail address: xkli@lzu.edu.cn (Prof. Li); maocl@lzu.edu.cn (Prof. Mao)

13 Tel: 86-931-8912561

14 Fax: 86-931-8912560

15

16

17        **Abstract**

18        Fungi are potential biological resources for refractory organics degradation, but  
19        their anaerobic degradation of azo dyes are rarely reported. In this study, a fungus  
20        *Aspergillus tabacinus* LZ-M was isolated grown aerobically and degraded acid red 73  
21        (AR73) with a decolorization rate of 90.28% in 5 days at 400 mg/L of concentration  
22        anaerobically. Metabolic pathway showed that AR73 was reduced into  
23        2-hydroxynaphthalene and aniline then mineralized into CO<sub>2</sub>. The anaerobic  
24        self-redox process revealed electrons generated in carbon oxidation and transferred to  
25        -C-N= and -N=N, resulting in complete mineralization of AR73 in strain LZ-M. Data  
26        of transcriptome analysis showed that the benzene compounds produced from AR73  
27        by dechlorizing reductase entered the catechol pathway and glycolysis process to  
28        mineralize. Enzymes involved in aromatics degradation, glycolysis processes,  
29        cytochrome C and quinone oxidoreductases were up-regulate, but the key reductase  
30        responsible to cleave AR73 to phenylhydrazine was not found. A novel enzyme Ord95  
31        containing a glutamate S-transferase domain was identified in the unknown genes as a  
32        reductase which cleaving -C-N= in AR73 using NADH as electron donor, and three  
33        arginines key active sites. These observations reveal a new degradation mechanism of  
34        AR73 in strain LZ-M which would be potential candidate for treatment of azo dyes  
35        wastewater.

36        **Keywords:** *Aspergillus*; Azo dyes; Transcriptome; Anaerobic decolorization.

37

38

39

## Graphical abstract

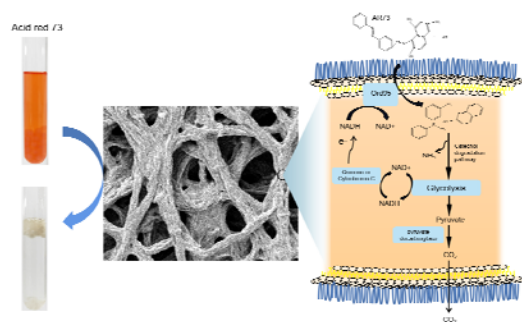

40

41

42

## 43        **1. Introduction**

44        Azo dyes are widely used as colorants in different fields of its properties, such as  
45        vivid colors, tinctorial strength, and ease of manufacturing, and approximately 450  
46        000 tons of azo dyes are consumed annually (1, 2). Among 15% of dyes used in the  
47        industries are discharged into wastewater (3). Dyes are refractory, toxic and  
48        mutagenic, inevitably causing extensive pollution in both aquatic and terrestrial  
49        systems (4). In recent decades, biotechnologies have shown efficiency and  
50        affordability advantages in treatment of wastewater containing toxic and refractory  
51        dyes (5). Especially, bacteria-mediated treatments have emerged to eliminate azo dyes  
52        from wastewater (6, 7). Nevertheless, the bacterial treatment can only decolorize, but  
53        not able to achieve the complete mineralization of azo dyes (3, 8). The symmetrically  
54        breakdown of azo bond by bacteria is easily to accumulate aromatic amines, which  
55        are toxic to organisms and are stubborn for biodegradation (9). The asymmetric  
56        breakage of azo bond or complete mineralization of azo dyes by microorganisms are  
57        rare. Therefore, it is essential to find the microorganisms that can degrade the azo  
58        dyes to non-toxic substances.

59        Fungi, as a decomposer showed significant capabilities in the degradation of  
60        toxic and refractory organics including lignin, cellulose, pharmaceuticals, polycyclic  
61        aromatic hydrocarbons, and etc. (10, 11). Fungi secrete non-specific oxidases and  
62        completely mineralize these pollutants into CO<sub>2</sub> (12). For example, benzo[a]pyrene is  
63        mineralized to CO<sub>2</sub> by the white rot fungus *Pleurotus ostreatus* (13). *Aspergillus*  
64        *versicolor* LH1 completely degrade methyl red at 200 mg/L of concentration (2), and

65 *A. niger* decolorize acid blue 161 up to 58% (3). However, the decolorization of azo  
66 dyes are commonly more effective under anaerobic than aerobic conditions (9). This  
67 is because of the azo reduction enzyme for the initial cleavage of the azo bond  
68 sensitive to oxygen (2, 14). Similarly, the electron withdrawing nature of the azo bond  
69 impedes the susceptibility of dye molecules to oxidative reaction and, thus, azo dyes  
70 show resistance to aerobic biodegradation (14). Fungi commonly grow under aerobic  
71 condition, and degradation of azo dyes under anaerobic condition was less reported.

72 Some reports suggest that aerobic microorganisms have potential for anaerobic  
73 reaction (15). For example, *Lysinibacillus* sp. NP05 was capable of degrading  
74 polychlorinated biphenyls under anaerobic condition (15). *Pseudomonas denitrificans*  
75 G1 grew under the aerobic condition, and could achieve effective denitrification under  
76 the anaerobic conditions (16). An obligately aerobic bacterium, *Zetaproteobacteria*,  
77 has an anaerobic metabolic pathway by genome analysis (17). This indicates that  
78 enzymes associated with anaerobic function are secreted by this aerobic  
79 microorganism. There are evidences that auxiliary anaerobic metabolism exists in  
80 obligately aerobic fungi (18). An obligately aerobic fungus, *A. nidulans*, could survive  
81 under anaerobic conditions and exists the alcoholic fermentation pathway (18, 19). So,  
82 fungi have the potential to degrade azo dyes under anaerobic conditions.

83 The bio-degradation process of organic matter is usually accompanied with  
84 oxidation and reduction reactions. For example, lignin, plastic and dyes are  
85 oxidatively depolymerized by peroxidase (20). Anaerobic denitrification of organic  
86 nitrogen is a reduction process (21). Some organic matters are degraded

87 synchronously by oxidation and reduction in a self-redox process. For instance,  
88 bioconversion of organic matter to methane/H<sub>2</sub> during anaerobic biological  
89 fermentation (22). In a fermentation process, electrons were generated during butyrate  
90 oxidation and transferred to H<sup>+</sup> to generate acetate and H<sub>2</sub> (23). In this study, a fungus  
91 identified as *Aspergillus tabacinus* LZ-M could grow aerobically and degrade acid red  
92 73 (AR73) anaerobically. The analysis of metabolic pathway illustrated that LZ-M  
93 had a strong ability to mineralize AR73 via self-redox. A novel decolorizing reductase  
94 was excavated and its degrading mechanism was revealed. This study provides a new  
95 microbial resource for the biodegradation of azo dyes.

96

## 97 **2. Materials and methods**

### 98 2.1 Strain isolation and culture

99 To isolate microorganisms adapted to low-nutrient wastewater, a piece of  
100 parafilm (PM996) (1 cm × 1 cm) was floated in 100 mL of carbon-free liquid medium  
101 (1 g/L NaCl, 1 g/L K<sub>2</sub>HPO<sub>4</sub>, 1 g/L KH<sub>2</sub>PO<sub>4</sub>) and inoculated with 1 mL soil sample  
102 that was collected in the arboretum of Gansu Academy of Membrane Science and  
103 Technology in Gansu Province, China. After stationary culture for 30 days at room  
104 temperature (25-28 °C), flocculent microorganisms were growing around the parafilm.  
105 The flocculent microorganisms were transferred into the solid medium of Potato  
106 Dextrose Broth Medium (PDB, Solarbio, China), culture for 3 days at 30 °C. Pick  
107 spores into the solid medium of PDB for culturing until pure colonies were formed.  
108 For spore collection, using 10 mL 25% glycerol solution to elute the spores on the

109 surface of the colonies in a solid culture plate, and sucking the spore liquid into the  
110 cryogenic tubes and stored it at -80 °C.

111 The aerobic growth of this strain was conducted in 250-mL conical flasks  
112 containing 150 mL of liquid PDB medium with inoculating 150 uL of spore  
113 suspension, and mycelia pellets were formed after culturing for 2.5 days at 30 °C and  
114 200 rpm. The spore concentration is about  $10^4$  /mL, calculated as the number of  
115 mycelia pellets formed by liquid culture using serial dilution. For activated culture,  
116 the amount of spore inoculum is 1‰.

## 117 2.2 Chemicals

118 Acid red 73 was purchased from Sigma-Aldrich (St. Louis, USA). Methanol and  
119 ethyl acetate were HPLC grade. Other reagents were purchased from Solarbio Science  
120 & Technology Co.,Ltd. Beijing, China.

## 121 2.3 Anaerobic decolorization of fungi

122 Mycelia pellets from 300 mL aerobic activated medium were collected by  
123 filtration and washed for 5 times using ddH<sub>2</sub>O and then used for anaerobic  
124 degradation experiment. One liter of basal medium (BM) contained 1 g/L NaCl, 1 g/L  
125 KH<sub>2</sub>PO<sub>4</sub>, 1 g/L K<sub>2</sub>HPO<sub>4</sub>, and pH 7 was used to suspend the mycelium pellets. To  
126 analyze the ability of fungi to decolorize AR73 under anaerobic condition, AR73  
127 solutions were added into the medium to arrive the concentration of 50 mg/L. The 100  
128 mL of the mixed mycelium suspension was added to 250 mL anaerobic flasks  
129 respectively. Anaerobic flasks was filled with nitrogen for 20 min and stationary  
130 incubated in an anaerobic incubator at 30 °C (n=3). For anoxic culture, anaerobic

131 flasks without nitrogen pouring were incubated at 30 °C in static phase. For aerobic  
132 culture, flasks were rotationally incubated at 30 °C and 200 rpm. Experiment used  
133 sterile medium as controls. The samples were taken at different time interval for  
134 analysis.

#### 135 2.4 Effect of operation parameters on biodecolorization

136 The biodecolorization performance of AR73 by strain LZ-4 was evaluated under  
137 different culture conditions. Mycelia pellets from 900 mL aerobic activated medium  
138 were suspended in 3 L BM and divided into anaerobic bottles with 100 mL per bottle.  
139 To examine the effect of additional carbon sources, 1 g/L of soluble starch, glucose,  
140 potato, tyryptone, PDB medium were added into BM containing 50 mg/L AR73,  
141 respectively. To examine the effect of pH, the initial pH was adjusted to 3, 4, 5, 6, 7, 8,  
142 9, 10, and 10.5. In AR73 load experiments, the initial AR73 concentrations ranged  
143 from approximately 50-500 mg/L. To evaluate the ability of the strain LZ-M for other  
144 dyes and refractory organics removal, 50 mg/L methyl orange, 50 mg/L neutral red,  
145 30 mg/L malachite green, 10 mg/L metronidazole, 30 mg/L furazolidone and 30 mg/L  
146 3,5-dinitrosalicylic acid were added into BM, respectively. In order to test the  
147 long-term anaerobic decolorization by strain LZ-M, 2.5 mL of 2g/L AR73 was added  
148 to the anaerobic bottle when the color of the dye in the culture solution was  
149 disappeared, continuously, until occurring incomplete depigmentation after 24 hours.  
150 Unless the single-factor was adjusted as per the experimental design, the initial  
151 concentration of AR73 concentration was 50 mg/L. The fungal suspension was  
152 incubated for 5 days at 30 °C under anaerobic condition, and samples were collected



153 to determine the concentrations of substrate. All experiments were performed in three  
154 duplicate.

#### 155 2.5 LC/MS analyses of metabolites

156 After anaerobic degradation of 50 mg/L AR73 by strain LZ-M for 3 days, the  
157 culture supernatant was collected and sent to Wuhan Metware Biotechnology Co.,Ltd.  
158 for LC/MS analysis. Metabolic identification information was obtained by searching  
159 the company's database.

#### 160 2.6 Analysis of ITS sequencing and transcriptome sequencing

161 Mycelia pellets of strain LZ-M after aerobic growth were collected and send to  
162 Shanghai Majorbio Bio-pharm Technology Co.,Ltd (Shanghai, China) for DNA  
163 extraction and ITS sequencing.

164 To prepare the sample for transcriptome analysis, mycelia pellets of *A. tabacinus*  
165 LZ-M after aerobic growth were transferred to BM containing 50 mg/L AR73, filled  
166 with nitrogen for 20 min and cultured for 3.5 hours under anaerobic condition at  
167 30 °C. The culture cells were cultured at 200 rpm under aerobic condition were used  
168 as a control. After that, mycelia pellets were collected and send to Shanghai Majorbio  
169 Bio-pharm Technology Co.,Ltd (Shanghai, China) for RNA extraction and  
170 transcriptome sequencing.

#### 171 2.7 Cloning of unknown genes

172 The genes sequence of Ord95 and Ord118 was represented in supplementary and  
173 were clone as follows; the Ord95 fragment was amplified from the transcriptome  
174 RNA by polymerase chain reaction (PCR) using the primers Ord95F:

175 5'-CCGGAATTCATGTCAGATTCCACGCTCTACC-3' and Ord95R:  
176 5'-CCGCTCGAGGCCCTCCAACGCATCTTC-3'. The Ord118 fragment was PCR  
177 using the primers Ord118F: 5'-CCGGAATTCATGGCTACTCAAGCTATTAC-3'  
178 and Ord118R: 5'-CCCAAGCTTGCGGTGATGCAGCATGTC-3'. The Ord95 and  
179 Ord118 fragments were digested with restriction endonucleases and inserted into  
180 plasmid pET-28a, respectively. The recombinant plasmids pET28/Ord95 and  
181 pET28/Ord118 were transformed into *E.coli* Rosseta (DE3). For protein-induced  
182 expression, the cells were grown in Luria-Bertani medium containing Kanamycin (50  
183 µg/mL) and Chloramphenicol (30 µg/mL) at 37 °C. When cells grown to an OD<sub>600</sub> of  
184 0.6, 0.2 mM isopropyl β-D-1-thiogalactopyranoside was added to the medium and  
185 was then cultured for 20 h at 16 °C. Purification of protein followed as a previous  
186 study (24). The purified protein was detected using SDS-PAGE, and protein  
187 concentration was detected using Pierce BCA Protein Assay Kit (Thermo Fisher  
188 Scientific, United States).

189 Various Ord95 mutants were constructed by Phusion™ Site-Directed  
190 Mutagenesis Kit (Thermo Fisher Scientific, United States). The procedures for the  
191 expression and purification of these variants were similar to that of wild type Ord95.

## 192 2.8 Enzyme assay of Ord118, Ord95 and its mutants

193 To explore NADH dehydrogenase activity of purified Ord118 and Ord95, the  
194 enzyme assay was performed in 3 mL 20 mM Tris-HCl buffer (pH 7.0), containing  
195 0.28 mg/L protein, 200 µM NADH and was kept at 37 °C for 120 min. The reaction  
196 solution was placed in a cuvette, and the absorbance change of NADH was detected

197 by UV-Spectrophotometry (Hitachi U-3900H) at 340 nm in real time. To explore the  
198 AR73 decolorizing activity of purified proteins, the enzyme assay was performed in 5  
199 mL of 20 mM Tris-HCl buffer (pH 7.0) containing 0.28 mg/L protein, 25 mg/L AR73  
200 and 200  $\mu$ M NADH. The reaction solution was injected into vacuum tubes in an  
201 anaerobic incubator and kept at 37 °C for 48 h, and 200  $\mu$ L reaction solution was  
202 taken out from the vacuum tube every 12 h to measure the absorbance of AR73 at 510  
203 nm. Reaction with predenaturation protein treated for 15 min at 95 °C were used as  
204 controls.

## 205 2.9 Analytical methods

206 The surface structure of mycelia pellets of *A. tabacinus* LZ-M was observed by  
207 scanning electron microscopy (JEOL JSM-IT500LA). Spectrophotometry was used to  
208 measure the concentrations of AR73, methyl orange, neutral red and malachite green  
209 at wavelength of 510 nm, 462 nm, 523 nm and 620 nm, respectively. Concentrations  
210 of metronidazole, furazolidone, and 3, 5-dinitrosalicylic acid were determined using  
211 UV-Spectrophotometry (Hitachi U-3900H) at wavelength of 320 nm, 370 nm and 350  
212 nm, respectively.

213 Phenylhydrazine and aniline in the culture and enzymatic reaction solutions were  
214 detected by high-performance liquid chromatography (HPLC, Agilent 1260). HPLC  
215 analysis utilized an Agilent Eclipse XDB-C18 (4.6 mm  $\times$ 250 mm, 5 $\mu$ m), the mobile  
216 phase was methanol/H<sub>2</sub>O solution (40:60, v/v) at a flow rate of 1.5 mL/min. An  
217 injection volume of 10  $\mu$ L was used and the UV detection was performed at 280 nm.  
218 The content of CO<sub>2</sub> produced in headspace of anaerobic bottle was detected by gas

219 chromatography (Agilent 6890N). The injector was set at 240 °C, the amount of gas  
220 sample in each injection was 20 uL, and a split less mode (60 mL/min) was used.

## 221 2.10 Statistical analysis

222 Statistical analyses were performed using SPSS v.17 software and Excel 2010.  
223 One-way Analysis of Variance was used to assess differences in the abundance of taxa  
224 and then values are presented as the mean  $\pm$  standard error. Subsequently, Tukey's test  
225 was used to determine the sample means that were significantly different.

226

## 227 **3. Results and discussion**

### 228 3.1 The identification of anaerobic AR73 degradation fungus

229 A fungus growing on parafilm surface in liquid medium was isolated which has  
230 100% similarity to *Asperillus tabacinus* NRRL 4791, and named as *Aspergillus*  
231 *tabacinus* LZ-M (Fig. 1A). The isolated strain LZ-M was grow at 150-250 rpm, where  
232 the biomass growth rate increased with the rotation speed (Fig. S1), while less than  
233 100 rpm strain LZ-M growth was inhibited. This result indicated that strain LZ-M was  
234 obligately aerobic fungus. The mycelium pellets of strain LZ-M was formed after  
235 aerobic growth, and placed it in an anaerobic environment. After 24 h, bubbles were  
236 generated in the culture medium, carrying the mycelium to the top of liquid (Fig. 1B).  
237 Furthermore, the dye AR73 was completely decolorized after 48 hours of incubation  
238 in anaerobic condition. Scanning electron microscope images confirmed the softening  
239 of hyphae caused by gas secretion (Fig. 1C). This data indicates that the aerobic strain  
240 LZ-M uses AR73 as a substrate for respiration and metabolism under anaerobic

241 environment.

242 *Aspergillus* fungi growing under aerobic condition (2, 25), which was consistent  
243 with *A. tabacinus* LZ-M reported in this study. The mycelium pellets and morphology  
244 are also similar to the *Aspergillus* species, such as *A. niger* and *A. versicolor* (26, 27).  
245 The mycelium of strain LZ-M produced gas and decolorized AR73, surviving in  
246 anaerobic environment. Similarly, anaerobic degradation of azo dyes by bacteria were  
247 also reported previously. For example, *S. oneidensis* MR-1 showed a decolorization  
248 capability for Cationic Red and *Pseudomonas sp.* SUK1 could decolorize dye Red  
249 BLI (6, 28). This phenomenon suggests that *A. tabacinus* LZ-M can be used as a  
250 potential strain for degradation of the azo dyes as similar as bacterial species.

### 251 3.2 The characteristics of dye degradation by *A. tabacinus* LZ-M

252 The decolorization ability of *A. tabacinus* LZ-M was compared under  
253 aerobic and anaerobic conditions (Fig. 2A). The results showed that strain LZ-M  
254 completely decolorized (96.8%) of AR73 in 50 mg/L of concentration at 40 h under  
255 anaerobic conditions. However, under aerobic conditions, mycelium does not have the  
256 ability to decolorize. The effect factors on anaerobic decolorization efficiency were  
257 analyzed. The addition of organic carbon sources, including glucose, PDB medium,  
258 tryptone, potato and soluble starch can promote strain LZ-M for decolorization.  
259 Among them, soluble starch increased the decolorization ratio from 36.21% to 93.8%  
260 within 18 h of incubation (Fig. 2B). The different initial concentrations of AR73 were  
261 tested (Fig. 2C). Strain LZ-M completely degraded AR73 in 200 mg/L while the  
262 removal rates were decreases to 96.33, 90.28 and 58.72 % in the 300, 400, and 500

263 mg/L of concentrations respectively. The anaerobic reaction achieved complete  
264 decolorization of 50 mg/L AR73 at a wide pH range of 4-10.5 and the removal rate  
265 was decreased to 43.09% in pH 3 (Fig. 2D). In the anaerobic degradation of  
266 multi-batch, this strain could completely degrade 50 mg/L AR73 for 5 times, and the  
267 decolorization efficiency began to decline at 5th addition (Fig. 2E). Degradation  
268 ability test of strain LZ-M on other organic matter under anaerobic condition was  
269 shown in Fig. 2F. The results revealed that strain LZ-M degraded 99.98%, 75.87%,  
270 42.55%, 50.315%, 87.375% and 57.43%, of 50 mg/L methyl orange, 50 mg/L neutral  
271 red, 30 mg/L malachite green, 10 mg/L metronidazole, 30 mg/L furazolidone, and 30  
272 mg/L 3,5-dinitrosalicylic acid within 5 days respectively. The content of these  
273 organics in aerobic culture was not changed (data not shown).

274 White rot fungus *Schizophyllum* adsorbs Acid Red 18 (100 mg/L) with a  
275 decolorization rate of 27% within 120 h (29). Another fungi *A. oryzae* showed 72.38%  
276 biosorption decolorization of Acid Red 337 (200 mg/L) (30). In contrast, this research  
277 reported the complete decolorization of 100-200 mg/L AR73 by strain LZ-M,  
278 showing a higher decolorization efficiency compared to the absorption of  
279 *Schizophyllum* and *A. oryzae*. The decolorization of strain LZ-M was also compared  
280 with the bacteria strains. *Stenotrophomonas sp.* BHUSSp X2 can achieve 90%  
281 decolorization of 500 mg/L Acid Red 1, while the effective decolorization is limited to  
282 pH 7-8 (31). *Bacillus thuringiensis* can achieve 60% decolorization of 500 mg/L acid  
283 red 119 (32). In this study, the strain LZ-M decolorized AR73 of 500 mg/L with a  
284 removal rate of 58.72% at 4-10.5 of pH ranges. The capability of stain LZ-M for

285 decolorizing high concentrations of acid red under anaerobic condition was  
286 comparable to that of *Bacillus thuringiensis* (32), and the pH range of stain LZ-M for  
287 decolorizing was wider than *Stenotrophomonas sp.* BHUSSp X2 (31). These results  
288 showed the application advantage of *A. tabacinus* LZ-M in the environmental  
289 biotechnology, such as decolorizing industrial dyes with high concentrations and  
290 changing pH. This continuous multi-batch decolorization experiment demonstrated  
291 the potential of strain LZ-M in dye wastewater treatment. And its degradation on a  
292 broad of organics indicated that it is a promising candidate in pollutant treatment.

### 293 3.3 The degradation pathway of AR73 in *A. tabacinus* LZ-M

294 In order to analyze the anaerobic degradation pathway of AR73, the degradation  
295 products of AR73 by *A. tabacinus* LZ-M were detected by LC-MS. The results  
296 showed that 17 compounds were identified in the AR73 degradation (Table S1).  
297 Putative degradation pathway of AR73 was shown in Fig. 3A. The first and second  
298 step of degradation of AR73 was to produce phenylhydrazine and  
299 hydroxynaphthalene by the cleavage of -C-N= bonds through hydrogenation  
300 reduction. And then, phenylhydrazine was deaminated to aniline.  
301 Hydroxynaphthalene and aniline was hydroxylating and opening the benzene ring to  
302 generate carboxylic acid compounds. Carboxylic acid compounds were  
303 decarboxylated to produce CO<sub>2</sub>. The concentrations of phenylhydrazine and aniline  
304 was detected in the culture medium (Fig. 3B and C). With the increase of time, the  
305 concentration of aniline kept increasing, while the concentration of phenylhydrazine  
306 decreased after 48h, indicating that the intermediate metabolites phenylhydrazine was

307 further denitrogenated into aniline. Gas produced in anaerobic reaction flasks was  
308 identified as CO<sub>2</sub> by gas chromatography. The content of CO<sub>2</sub> increased to 19.56%  
309 after 72 h in AR73 medium, and it was only 3.5% in the carbon-free control (Fig. 3D).  
310 This indicated that AR73 was mineralized into CO<sub>2</sub> by *A. tabacinus* LZ-M under the  
311 anaerobic condition.

312 The degradation of AR73 to benzenes were mainly achieved by the cleavage of  
313 -C-N= bonds. *A. versicolor* LH1 degrades methyl red by breaking the -C-N= bond  
314 linked with benzene (2). Degradations of disperse yellow 3 and acid orange 7 by  
315 *Phanerochaete chrysosporium* are also achieved by the -C-N= cleavage (33). In this  
316 study, the -C-N= cleavage by the strain LZ-M is similar to these fungi. In reports  
317 about the bacterial strains, the degradation of Acid Red 1 by *Stenotrophomonas sp.*  
318 BHUSSp X2 is achieved by -N=N- cleavage (31). Azoreductase derived from  
319 *Sphingomonas xenophaga* BN6 degrades azo dyes also through -N=N- cleavage (33).  
320 This indicates that the degradation of azo dyes by strain LZ-M is different from the  
321 anaerobic degradation of these bacteria. In a previous study, naphthalene or benzene is  
322 hydroxylated and then benzene ring is opening at the hydroxyl position (34). This is  
323 consistent with the degradation pathway of hydroxynaphthalene and aniline in this  
324 study. The mineralization of benzene compounds to generate CO<sub>2</sub> was achieved in  
325 white rot fungi and soil microbe (35, 36). The produce of CO<sub>2</sub> indicated that the  
326 intermediate produces were mineralized to CO<sub>2</sub>. In totally, the degradation of AR73 is  
327 mainly achieved by deamination and decarboxylation. AR73 was the sole source of  
328 carbon and nitrogen, which acted as both an oxidant and a reductant in the reaction, so



329 the degradation was achieved by self-redox process. The similar phenomenon was  
330 found in a previous study that *Syntrophomonas wolfei* can degrade butyrate to CO<sub>2</sub>  
331 and H<sub>2</sub> (23). During this self-redox reaction, the oxidant of AR73, and the reductant is  
332 the benzene compounds produced by AR73 decomposition.

### 333 3.4 Transcriptome analysis of fungi under aerobic and anaerobic conditions

334 In order to analyze the anaerobic degradation mechanism of *A. tabacinus* LZ-M,  
335 the differences of gene expression between aerobic and anaerobic conditions were  
336 analyzed by transcriptome sequencing. Under anaerobic conditions, a total of 4472  
337 differentially expressed transcripts were found, including 2156 up-regulated  
338 transcripts and 2316 down-regulated transcripts (Fig. S2). The function types of  
339 up-regulated transcripts were shown in Table S2, and 1271 transcripts displayed  
340 unknown function, accounted for 51.81% of up-regulated transcripts. In addition,  
341 carbohydrate transport and metabolism including 167 transcripts was the most varied  
342 functional type. This indicated that carbohydrate transport and metabolism were  
343 significantly changed under anaerobic condition. Genes related to cytochrome C  
344 oxidoreductase, quinone oxidoreductase and the biodegradation of aromatics were  
345 significantly up-regulated (Fig. 4). A complete set of genes involved in the glycolysis  
346 process was found in the transcriptome and exhibited high expression levels (Fig. 4).  
347 The gene expression of pyruvate decarboxylase was up-regulated considerably, and it  
348 increased from 11.5 transcripts to 939.8 transcripts per million reads. This indicated  
349 that the anaerobic carbon metabolism in strain LZ-M might be achieved by glycolysis  
350 and pyruvate decarboxylation.

351 In the degradation of AR73, the gene expression of enzymes involved in  
352 aromatics biodegradation, glycolysis and electron transfer were discovered, while the  
353 expression of gene involved in anaerobic decolorization or azoreduction was not found.  
354 The enzymes of aromatics biodegradation including 3-hydroxybenzoate  
355 4-monooxygenase, 3-hydroxybenzoate 6-hydroxylase, and catechol 1,2-dioxygenase.  
356 Catechol 1,2-dioxygenase is able to degrade benzene, toluene and ethylbenzene (37).  
357 3-hydroxybenzoate 4-monooxygenase and 3-hydroxybenzoate 6-hydroxylase are  
358 involved in benzoate degradation (38, 39). They may be involved in the metabolism  
359 of aniline and hydroxynaphthalene. Both aniline and naphthalene degradation  
360 intermediates salicylic acid, can enter the glycolysis process through glycosylation  
361 and phosphorylation for further metabolism (40, 41). In the glycolysis process, the  
362 splitting of the six-carbon glucose molecule into two pyruvate molecules by anaerobic  
363 oxidation (42). Pyruvate can be decarboxylated to acetaldehyde and CO<sub>2</sub> by pyruvate  
364 decarboxylase in a stage of fungal anaerobic fermentation (19). Therefore, the CO<sub>2</sub>  
365 generated in the anaerobic culture was considered as the result of anaerobic oxidation  
366 by glycolysis and fermentation (Fig. 3D). These results showed that strain LZ-M can  
367 completely mineralize AR73 to CO<sub>2</sub> under anaerobic conditions.

368 During the glycolysis, NADH is produced and it need to regenerate NAD<sup>+</sup> by  
369 dehydrogenation (42). NADH dehydrogenation requires electron transfer to the  
370 oxidized substrate, while the alcohol dehydrogenase that reduces acetaldehyde with  
371 NADH was rarely expression under anaerobic conditions (Fig. 4). Therefore, the  
372 regeneration of NAD<sup>+</sup> may be combined with the cleavage of -C-N= bond of AR73.

373 Cytochrome C oxidoreductase and quinone oxidoreductases often act as mediators of  
374 electron transfer in cellular activities (43). Gene involved in the electron transfer  
375 reactions are found to increasing expression during anaerobic organic degradation  
376 (22). The up-regulation of cytochrome C oxidoreductase and quinone oxidoreductase  
377 may assist in electron transferring and electron balance during self-redox degradation  
378 of AR73. The self-redox reaction was represented as follow.

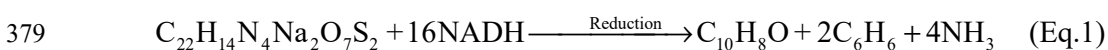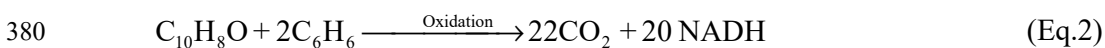

381 The degradation of AR73 was mainly achieved through carbon oxidation and  
382 nitrogen reduction. During the reduction process, 12 NADH are needed to decompose  
383 one molecule of AR73 to produce 4 molecules of  $NH_3$  (Eq.1). Similarly,  
384 hydroxynaphthalene and benzene analogs produced by one molecule of AR73 were  
385 completely mineralized to produce 22 molecules of  $CO_2$  and 20 NADH in oxidation  
386 process (Eq.2). It can be calculated by electron balance that when the self-redox  
387 equilibrium occurs, 80% of the carbon can be mineralized and converted into  $CO_2$ .  
388 Azoreductase from bacteria and lignin peroxidase, manganese peroxidase and laccase  
389 from the fungi are able to degrade azo dyes (33), while they are not expression in  
390 strain LZ-M under anaerobic condition. Genes annotated as unknown function  
391 accounted for 51.81% of up-regulated transcripts. Thus, there may be new  
392 decolorizing enzyme among unknown genes that worth to explore.

### 393 3.5 Cloning and expression of unknown genes

394 The up-regulation genes were further screened based on the criteria that

395 transcript expression level more than 150 counts and expression up-regulated fold  
396 more than 4.0, and then 140 genes was obtained. Among them, 51 genes were  
397 classified as oxidoreductase in enzymatic classification, 60 genes belonged to other  
398 classifications, and 29 genes belonged to unknown genes (Fig. 5A). Based on  
399 expression similarity (44), unknown genes have a high probability of being redox  
400 genes. Two unknown genes, named ord95 and ord118, have been cloned into *E.coli*  
401 Rosetta (DE3) and expressed by induction. The two proteins were purified  
402 successfully and detected by SDS-PAGE method (Fig. 5B). Alignment in NCBI  
403 database, the Ord95 gene showed the highest sequence identity of 58.71% with  
404 aconitate hydratase from *A. tubingensis*. Ord118 showed 100% similarity to  
405 hypothetical protein and no similarity to other functional proteins. The NADH  
406 dehydrogenase activity assay showed that both of them had NADH dehydrogenase  
407 activity (Fig. 5C and D). When the concentration of protein was 0.28 mg/L, the  
408 absorbance of NADH at A340 nm reduced at rate of 0.001 /min and 0.00043 /min by  
409 Ord118 and Ord95, respectively. Protein Ord95 and Ord118 were also found to have  
410 NADH-DCIP reductase activity using Biyuntian NADH oxidase detection kit (Fig.  
411 S3). These results suggest that both Ord95 and Ord118 are redox type enzymes. The  
412 enzyme activity analysis of AR73 decolorization using NADH as electron donor was  
413 conducted, and Ord95 had anaerobic decolorization enzyme activity (Fig. 5E and F),  
414 and the optimal reaction conditions of the enzymatic anaerobic decolorization were  
415 37°C and pH 7.0 (Fig. S4). It couldn't decolorize under aerobic conditions. When the  
416 concentration of AR73 was 25 mg/L and the concentration of Ord95 protein was 0.28

417 mg/L, the decolorization rate of AR73 was 0.4696 mg/L/h. This result confirms that  
418 Ord95 is a decolorizing reductase, and it might be the enzyme involved in the  
419 anaerobic decolorizing of AR73.

### 420 3.6 Analysis of the decolorization mechanism of protein Ord95

421 In the degradation of AR73 by Ord95, aniline and phenylhydrazine were detected  
422 by HPLC in enzymatic reaction (Fig. 6A). The content of phenylhydrazine was  
423 increased at 24 h and decreased at 48 h, while the content of aniline kept increasing  
424 (Fig. 6B). This suggestion that Ord95 is the enzyme that broke the AR73 of -C-N=  
425 bond and its products were similar to fungal. Alignment in NCBI database, the 26-80  
426 position of Ord95 sequence is similar to the glutathione S-transferase N-terminal  
427 domain with E-value of 7.07e-03, suggesting that this domain may be its active region.  
428 The main active site of glutathione transferase usually contains arginine (R) and  
429 tyrosine (Y) (45). The arginine and tyrosine near the domain region on the Ord95  
430 were mutated to alanine (A), including 7Y, 8Y, 38R, 54R, 55R, 67Y. The 6 mutant  
431 proteins were expressed and purified (Fig. 6C), and their decolorizing activity was  
432 analyzed (Fig. 6D). Compared with Ord95 protein, the enzyme activity of mutants  
433 38R>A, 54R>A, 55R>A decreased significantly to 43.1%, 17.43% and 36.9%,  
434 respectively. The enzyme activity of mutants 7Y>A, 9Y>A, 67Y>A did not change  
435 significantly. It suggested that 38R, 54R, 55R may be the active site of Ord95.  
436 Searching for template of 3D structure model of Ord95 in SWISS-MODEL, *C.*  
437 *albicans* actin binding protein 6m4c.1.A exhibited the highest quaternary structure  
438 quality estimate (QSQE) of 0.26, and the sequence identify was 32.98%. It suggests

439 that Ord95 is a novel protein and its function has not been analyzed. Thus, 6m4c.1.A  
440 was selected as the template for use in homology model constructions of Ord95 by  
441 SWISS-MODEL. The functional domain of this protein was simulated as shown in  
442 the Fig. 6E and F. The model was a dimer with each monomer consisting of 1 beta  
443 sheet and 3 alpha helices.

444 Three arginines were identified as the key sites of Ord95. The active site of  
445 glutathione transferases containing arginine is found in previous study (45). Arginine  
446 is an amino acid containing a guanidine group, which catalyzes the cycle of ornithine,  
447 promotes the formation of urea in organisms and turns ammonia into urea (46). Ord95  
448 can aminate AR73 to form phenylhydrazine and aniline, which is associated with  
449 nitrogen metabolism. Therefore, the presence of arginine might promote the  
450 amination of nitrogen during AR73 degradation by Ord95. The degradation products  
451 of AR73 by the enzyme are similar to the degradation products by strain LZ-M,  
452 indicating that Ord95 is the functional enzyme for anaerobic decolorization. The  
453 metabolic mechanism of AR73 in strain LZ-M was represented in Fig. S5.

454 Accordingly, it was proved that strain LZ-M had a strong ability to completely  
455 mineralize azo dyes under anaerobic conditions, making up for the shortcomings of  
456 bacteria. This is the first report of the anaerobic degradation of azo dyes by obligately  
457 aerobic fungus. Besides, through the excavation of functional enzymes, new  
458 decolorizing enzymes were found, and the degradation mechanism of self-redox was  
459 revealed, which has not been reported in previous studies. Under anaerobic conditions,  
460 this self-redox degradation is rapid and complete. AR73 act as carbon and nitrogen

461 source, reduced using NADH as an electronic donor and oxidized in glycolysis by  
462 strain LZ-M. Ord95 could cleave -C-N= in AR73 in the first step, and NADH  
463 generated during glycolysis can be delivered to Ord95. Fungi possess strong abilities  
464 to degrade refractory organic matter and secrete many function enzymes (47, 48).  
465 There are 128 *Aspergillus* genomes in the NCBI genome database, and 10,000-13,000  
466 proteins were detected in each genome. Therefore, the excavation of fungal functional  
467 proteins has great application potential. However, the studies committed to organics  
468 degradation mechanism and functional proteins in fungi are still limited, and  
469 transcriptome analysis in this study revealed that a large number of proteins in strain  
470 LZ-M have not been identified yet. Furthermore, expanding of the protein library of  
471 fungi and the excavating functional enzymes might be focused in the further research.

472

### 473 **Acknowledgments**

474 This work was supported by National Natural Science Foundation Grant (No:  
475 31870082, 32070117), International Science and technology Cooperation project of  
476 Gansu Province (No: 2021-0204-GHC-0019), Gansu Science and Technology  
477 Association project (No: GKX20210506-16-5) and Lanzhou science and technology  
478 plan project (grant numbers: 2019-4-40). We thanks the Central Lab of School of Life  
479 Sciences, Lanzhou University for providing necessary equipment.

### 480 **Date availability**

481 Transcriptome data of *A. tabacinus* LZ-M under aerobic culture and anaerobic  
482 culture is deposited at the Sequence Read Archive (<https://www.ncbi.nlm.nih.gov/>)

483 under the accession numbers SRR14455363 and SRR14455360, respectively. The ITS  
484 gene sequence of *A. tabacinus* LZ-M is deposited under the accession numbers  
485 MZ127527 in NCBI (<https://www.ncbi.nlm.nih.gov/search/all/?term=MZ127527>).  
486 Data of LC-MS metabolite analysis are in the attachments named  
487 LC-MS\_CK\_vs\_AR73\_neg\_info and LC-MS\_CK\_vs\_AR73\_pos\_info.

488

## 489 Reference

- 490 1. P. M. Miladinova, R. K. Vaseva, V. R. Lukanova, On the synthesis and application  
491 of some mono- and dis-azo acid dyes. *J. Chem. Technol. Metall* **51**, 249-256 (2016).
- 492 2. C. Y. Hu, H. Y. Cheng, X. M. Yao, L. Z. Li, H. W. Liu, W. Q. Guo, L. S. Yan, J. L.  
493 Fu, Biodegradation and decolorization of methyl red by *Aspergillus versicolor* LH1.  
494 *Preparative biochemistry & biotechnology* **51**, 642-649  
495 (2021)10.1080/10826068.2020.1848868).
- 496 3. E. J. R. Almeida, C. R. Corso, Decolorization and removal of toxicity of textile  
497 azo dyes using fungal biomass pelletized. *International Journal of Environmental Science and*  
498 *Technology* **16**, 1319-1328 (2018)10.1007/s13762-018-1728-5).
- 499 4. S. Mahmood, A. Khalid, M. Arshad, T. Mahmood, D. E. Crowley, Detoxification  
500 of azo dyes by bacterial oxidoreductase enzymes. *Critical reviews in biotechnology* **36**,  
501 639-651 (2016); published online EpubAug (10.3109/07388551.2015.1004518).
- 502 5. Y. Huang, X. Hou, S. Liu, J. Ni, Correspondence analysis of bio-refractory  
503 compounds degradation and microbiological community distribution in anaerobic filter for  
504 coking wastewater treatment. *Chemical Engineering Journal* **304**, 864-872  
505 (2016)10.1016/j.cej.2016.05.142).
- 506 6. D. C. Kalyani, P. S. Patil, J. P. Jadhav, S. P. Govindwar, Biodegradation of reactive  
507 textile dye Red BLI by an isolated bacterium *Pseudomonas* sp. SUK1. *Bioresource technology*  
508 **99**, 4635-4641 (2008); published online EpubJul (10.1016/j.biortech.2007.06.058).
- 509 7. E. Z. Wang, Y. Wang, D. Xiao, Polymer Nanocomposites for Photocatalytic  
510 Degradation and Photoinduced Utilizations of Azo-Dyes. *Polymers* **13**, 1215 (2021).
- 511 8. G. Rajhans, S. K. Sen, A. Barik, S. Raut, Elucidation of fungal dye-decolourizing  
512 peroxidase (DyP) and ligninolytic enzyme activities in decolorization and mineralization of  
513 azo dyes. *Journal of applied microbiology* **129**, 1633-1643 (2020); published online EpubDec  
514 (10.1111/jam.14731).
- 515 9. C. Zhang, H. Chen, G. Xue, Y. Liu, S. Chen, C. Jia, A critical review of the aniline  
516 transformation fate in azo dye wastewater treatment. *Journal of Cleaner Production* **321**,  
517 128971 (2021)10.1016/j.jclepro.2021.128971).
- 518 10. M. Esterhuizen, S. Behnam Sani, L. Wang, Y. J. Kim, S. Pflugmacher,  
519 Mycoremediation of acetaminophen: Culture parameter optimization to improve efficacy.



- 520 *Chemosphere* **263**, 128117 (2021)10.1016/j.chemosphere.2020.128117).
- 521 11. N. Akhtar, M. A.-u. Mannan, Mycoremediation: Expunging environmental
- 522 pollutants. *Biotechnology Reports* **26**, e00452 (2020)10.1016/j.btre.2020.e00452).
- 523 12. A. M. Q. López, A. L. d. S. Silva, E. C. L. d. Santos, The fungal ability for
- 524 biobleaching/biopulping/bioremediation of lignin-like compounds of agro-industrial raw
- 525 material. *Química Nova* **40**, 916-931 (2017).
- 526 13. F. J. Márquez-Rocha, V. Z. Hernández-Rodríguez, R. Vázquez-Duhalt,
- 527 Biodegradation of soil-adsorbed polycyclic aromatic hydrocarbons by the white rot fungus
- 528 *Pleurotus ostreatus*. *Biotechnology letters* **22**, 469-472 (2000).
- 529 14. A. Khalid, M. Arshad, D. Crowley, Bioaugmentation of azo dyes. *Biodegradation*
- 530 *of Azo Dyes*, 1-37 (2010).
- 531 15. G. Pathiraja, P. Egodawatta, A. Goonetilleke, V. S. J. Te'o, Solubilization and
- 532 degradation of polychlorinated biphenyls (PCBs) by naturally occurring facultative anaerobic
- 533 bacteria. *Science of The Total Environment* **651**, 2197-2207
- 534 (2019)10.1016/j.scitotenv.2018.10.127).
- 535 16. Z. Chen, Y. Jiang, Z. Chang, J. Wang, X. Song, Z. Huang, S. Chen, J. Li,
- 536 Denitrification characteristics and pathways of a facultative anaerobic denitrifying strain,
- 537 *Pseudomonas denitrificans* G1. *Journal of bioscience and bioengineering* **129**, 715-722
- 538 (2020)10.1016/j.jbiosc.2019.12.011).
- 539 17. A. Jain, J. A. Gralnick, Evidence for auxiliary anaerobic metabolism in obligately
- 540 aerobic Zetaproteobacteria. *The ISME journal* **14**, 1057-1062 (2020); published online
- 541 EpubApr (10.1038/s41396-020-0586-6).
- 542 18. R. E. Bradshaw, D. M. Bird, S. Brown, R. E. Gardiner, P. Hirst, Cytochrome c is
- 543 not essential for viability of the fungus *Aspergillus nidulans*. *Molecular genetics and genomics*
- 544 : *MGG* **266**, 48-55 (2001); published online EpubSep (10.1007/s004380100517).
- 545 19. R. A. Lockington, G. N. Borlace, J. M. Kelly, Pyruvate decarboxylase and
- 546 anaerobic survival in *Aspergillus nidulans*. *Gene* **191**, 61-67 (1997); published online
- 547 EpubMay 20 (10.1016/s0378-1119(97)00032-2).
- 548 20. P. A. Belinky, N. Flikshtein, S. Lechenko, S. Gepstein, C. G. Dosoretz, Reactive
- 549 oxygen species and induction of lignin peroxidase in *Phanerochaete chrysosporium*. *Applied*
- 550 *and environmental microbiology* **69**, 6500-6506 (2003); published online EpubNov
- 551 (10.1128/aem.69.11.6500-6506.2003).
- 552 21. V. Matikka, H. Heinonen-Tanski, Reduction of phosphorus, nitrogen and
- 553 microorganisms in pilot scale sand filter beds containing biotite, treating primary wastewater.
- 554 *Environmental technology* **37**, 46-54 (2016)10.1080/09593330.2015.1063703).
- 555 22. S. Kleindienst, K. Chourey, G. Chen, R. W. Murdoch, S. A. Higgins, R. Iyer, S. R.
- 556 Campagna, E. E. Mack, E. S. Seger, R. L. Hettich, Proteogenomics reveals novel reductive
- 557 dehalogenases and methyltransferases expressed during anaerobic dichloromethane
- 558 metabolism. *Applied and environmental microbiology* **85**, e02768-02718 (2019).
- 559 23. C. Liu, L. Ren, B. Yan, L. Luo, J. Zhang, M. K. Awasthi, Electron transfer and
- 560 mechanism of energy production among syntrophic bacteria during acidogenic fermentation:
- 561 A review. *Bioresource technology* **323**, 124637 (2021); published online Epub2021/03/01/
- 562 (<https://doi.org/10.1016/j.biortech.2020.124637>).
- 563 24. H. Han, Y. Zheng, T. Zhou, P. Liu, X. Li, Cu(II) nonspecifically binding chromate

- 564 reductase NfoR promotes Cr(VI) reduction. *Environmental microbiology* **23**, 415-430  
565 (2020)10.1111/1462-2920.15329).
- 566 25. C. He, Y. Huang, P. Liu, J. Wei, Y. Yang, L. Xu, M. Xiao, Transcriptome analysis  
567 of genes and metabolic pathways associated with nicotine degradation in *Aspergillus oryzae*  
568 112822. *BMC genomics* **20**, 86 (2019); published online EpubJan 24  
569 (10.1186/s12864-019-5446-2).
- 570 26. S. K. Das, I. Shome, A. K. Guha, Surface functionalization of *Aspergillus*  
571 *versicolor* mycelia: in situ fabrication of cadmium sulphide nanoparticles and removal of  
572 cadmium ions from aqueous solution. *RSC advances* **2**, 3000 (2012)10.1039/c2ra01273a).
- 573 27. G. K. Villena, T. Fujikawa, S. Tsuyumu, M. Gutiérrez-Correa, Structural analysis  
574 of biofilms and pellets of *Aspergillus niger* by confocal laser scanning microscopy and cryo  
575 scanning electron microscopy. *Bioresource technology* **101**, 1920-1926  
576 (2010)10.1016/j.biortech.2009.10.036).
- 577 28. Q. Li, X. L. Feng, T. T. Li, X. R. Lu, Q. Y. Liu, X. Han, Y. J. Feng, Z. Y. Liu, X. J.  
578 Zhang, X. Xiao, Anaerobic decolorization and detoxification of cationic red X-GRL by  
579 *Shewanella oneidensis* MR-1. *Environmental technology* **39**, 2382-2389 (2018); published  
580 online EpubSep (10.1080/09593330.2017.1355933).
- 581 29. S. Renganathan, W. R. Thilagaraj, L. R. Miranda, P. Gautam, M. Velan,  
582 Accumulation of Acid Orange 7, Acid Red 18 and Reactive Black 5 by growing  
583 *Schizophyllum commune*. *Bioresource technology* **97**, 2189-2193  
584 (2006)10.1016/j.biortech.2005.09.018).
- 585 30. Y. Yang, D. Jin, G. Wang, S. Wang, X. Jia, Y. Zhao, Competitive biosorption of  
586 Acid Blue 25 and Acid Red 337 onto unmodified and CDAB-modified biomass of *Aspergillus*  
587 *oryzae*. *Bioresource technology* **102**, 7429-7436 (2011); published online Epub2011/08/01/  
588 (<https://doi.org/10.1016/j.biortech.2011.05.023>).
- 589 31. L. Kumari, D. Tiwary, P. K. Mishra, Biodegradation of C.I. Acid Red 1 by  
590 indigenous bacteria *Stenotrophomonas* sp. BHUSSp X2 isolated from dye contaminated soil.  
591 *Environmental Science and Pollution Research* **23**, 4054-4062  
592 (2015)10.1007/s11356-015-4351-8).
- 593 32. S. R. Dave, R. H. Dave, Isolation and characterization of *Bacillus thuringiensis* for  
594 Acid red 119 dye decolourisation. *Bioresource technology* **100**, 249-253  
595 (2009)10.1016/j.biortech.2008.05.019).
- 596 33. A. Stolz, Basic and applied aspects in the microbial degradation of azo dyes.  
597 *Applied microbiology and biotechnology* **56**, 69-80 (2001)10.1007/s002530100686).
- 598 34. R. U. Meckenstock, M. Boll, H. Mouttaki, J. S. Koelschbach, P. Cunha Tarouco, P.  
599 Weyrauch, X. Dong, A. M. Himmelberg, Anaerobic Degradation of Benzene and Polycyclic  
600 Aromatic Hydrocarbons. *Microbial Physiology* **26**, 92-118 (2016)10.1159/000441358).
- 601 35. R. Martens, F. Zadrazil, Screening of white-rot fungi for their ability to mineralize  
602 polycyclic aromatic hydrocarbons in soil. *Folia microbiologica* **43**, 97-103  
603 (1998)10.1007/bf02815552).
- 604 36. T. F. Guerin, Ex-situ bioremediation of chlorobenzenes in soil. *Journal of*  
605 *hazardous materials* **154**, 9-20 (2008); published online EpubJun 15  
606 (10.1016/j.jhazmat.2007.09.094).
- 607 37. F. Révész, M. Farkas, B. Kriszt, S. Szoboszlai, T. Benedek, A. Táncsics, Effect of

- 608 oxygen limitation on the enrichment of bacteria degrading either benzene or toluene and the  
609 identification of *Malikia spinosa* (Comamonadaceae) as prominent aerobic benzene-, toluene-,  
610 and ethylbenzene-degrading bacterium: enrichment, isolation and whole-genome analysis.  
611 *Environmental Science and Pollution Research* **27**, 31130-31142  
612 (2020)10.1007/s11356-020-09277-z).
- 613 38. T. Hiromoto, S. Fujiwara, K. Hosokawa, H. Yamaguchi, Crystal structure of  
614 3-hydroxybenzoate hydroxylase from *Comamonas testosteroni* has a large tunnel for substrate  
615 and oxygen access to the active site. *Journal of molecular biology* **364**, 878-896 (2006);  
616 published online EpubDec 15 (10.1016/j.jmb.2006.09.031).
- 617 39. H. Yu, S. Zhao, W. Lu, W. Wang, L. Guo, A novel gene, encoding  
618 3-aminobenzoate 6-monooxygenase, involved in 3-aminobenzoate degradation in *Comamonas*  
619 sp. strain QT12. *Applied microbiology and biotechnology* **102**, 4843-4852 (2018); published  
620 online EpubJun (10.1007/s00253-018-9015-4).
- 621 40. B. G. Hall, L. Xu, Nucleotide sequence, function, activation, and evolution of the  
622 cryptic asc operon of *Escherichia coli* K12. *Molecular biology and evolution* **9**, 688-706  
623 (1992); published online EpubJul (10.1093/oxfordjournals.molbev.a040753).
- 624 41. D. S. Frear, Herbicide metabolism in plants—I: Purification and properties of  
625 UDP-glucose: Arylamine N-glucosyl-transferase from soybean. *Phytochemistry* **7**, 381-390  
626 (1968); published online Epub1968/03/01/ ([https://doi.org/10.1016/S0031-9422\(00\)90876-8](https://doi.org/10.1016/S0031-9422(00)90876-8)).
- 627 42. Z. Dai, Y. Zhu, H. Dong, C. Zhao, Y. Zhang, Y. Li, Enforcing ATP hydrolysis  
628 enhanced anaerobic glycolysis and promoted solvent production in *Clostridium*  
629 *acetobutylicum*. *Microbial Cell Factories* **20**, (2021)10.1186/s12934-021-01639-7).
- 630 43. X. Yu, Y. Jiang, H. Huang, J. Shi, K. Wu, P. Zhang, J. Lv, H. Li, H. He, P. Liu, X.  
631 Li, Simultaneous aerobic denitrification and Cr(VI) reduction by *Pseudomonas*  
632 *brassicacearum* LZ-4 in wastewater. *Bioresource technology* **221**, 121-129 (2016); published  
633 online EpubDec (10.1016/j.biortech.2016.09.037).
- 634 44. K. V. Solomon, C. H. Haitjema, J. K. Henske, S. P. Gilmore, D. Borges-Rivera, A.  
635 Lipzen, H. M. Brewer, S. O. Purvine, A. T. Wright, M. K. Theodorou, I. V. Grigoriev, A.  
636 Regev, D. A. Thompson, M. A. O'Malley, Early-branching gut fungi possess a large,  
637 comprehensive array of biomass-degrading enzymes. *Science* **351**, 1192-1195 (2016);  
638 published online EpubMar 11 (10.1126/science.aad1431).
- 639 45. A. Oakley, Glutathione transferases: a structural perspective. *Drug metabolism*  
640 *reviews* **43**, 138-151 (2011).
- 641 46. J. Baier, M. Gänsbauer, C. Giessler, H. Arnold, M. Muske, U. Schleicher, S.  
642 Lukassen, A. Ekici, M. Rauh, C. Daniel, A. H. rtmann, B. Schmid, P. Tripal, K. Dettmer, P. J.  
643 Oefner, R. Atreya, S. Wirtz, C. Bogdan, J. Mattner, Arginase impedes the resolution of colitis  
644 by altering the microbiome and metabolome. *Journal of Clinical Investigation* **130**, 5703-5720  
645 (2020)10.1172/jci126923).
- 646 47. H. S. Park, S. C. Jun, K. H. Han, S. B. Hong, J. H. Yu, Diversity, Application, and  
647 Synthetic Biology of Industrially Important *Aspergillus* Fungi. *Advances in applied*  
648 *microbiology* **100**, 161-202 (2017)10.1016/bs.aambs.2017.03.001).
- 649 48. V. Arantes, A. M. Milagres, T. R. Filley, B. Goodell, Lignocellulosic  
650 polysaccharides and lignin degradation by wood decay fungi: the relevance of nonenzymatic  
651 Fenton-based reactions. *Journal of industrial microbiology & biotechnology* **38**, 541-555

652 (2011); published online EpubApr (10.1007/s10295-010-0798-2).

653

654

655 **Figure captions**

656

657 Fig. 1 The identification of fungi LZ-M and its decolorization of acid red 73  
658 under anaerobic condition. (A) Phylogenetic tree of strain LZ-M based on ITS  
659 sequencing; (B) Anaerobic decolorization process of fungi LZ-M mycelium in  
660 anaerobic tubes; (C) Scanning electron microscope images of the surface structure of  
661 mycelium: (i) mycelium after aerobic culture for 48h; (ii) mycelium at initial time of  
662 anaerobic culture; (iii) mycelium after anaerobic culture for 24h; (iv) mycelium after  
663 anaerobic culture for 48 h.

664 Fig. 2 Effect factors of anaerobic decolorization of AR73 by *A. tabacinus* LZ-M  
665 and its degradation ability on other organic matter. (A) Variation curve of AR73 under  
666 aerobic and anaerobic conditions at different time; The effect of different carbon  
667 sources (B), AR73 concentrations (C) and pH (D) on decolorization; (E) Continuous  
668 decolorization of AR73 with multiple addition; (F) Anaerobic degradation of *A.*  
669 *tabacinus* LZ-M on different organic matters. All reaction experiments were

670 Fig. 3 The degradation pathway of AR73 by *A. tabacinus* LZ-M. (A)  
671 Presumptive metabolic pathway of AR73 based on the products in LC-MS analysis  
672 results; The contents of phenylhydrazine (B), aniline (C) and CO<sub>2</sub> (D) in anaerobic  
673 culture at differe

674 Fig. 4 Expression counts of gene in *A. tabacinus* LZ-M after anaerobic and  
675 aerobic culture by transcriptome sequencing, including glycolysis process, aromatics  
676 degradation, cytochrome C oxidase and quinone oxidoreductase related genes.

677 Fig. 5 Unknown gene expression and function identification. (A) The distribution  
678 of oxidoreductase genes and unknown genes among the top 140 genes of up-regulated  
679 expression (count value > 150, up-regulated multiple > 4); (B) The unknown genes such  
680 as Ord95 and Ord118 after expression and purification were showed in the SDS-PAGE;  
681 (C, D) Dehydrogenase activity assay of Ord118 and Ord95 (mean  $\pm$  SE, n = 3); (E-F)  
682 AR73 decolorization activity analysis of Ord95 (mean  $\pm$  SE, n = 3). The concentrations  
683 of enzyme used were 0.28 mg/L.

684 Fig. 6 Products of enzymatic degradation of AR73 and structural prediction of  
685 Ord95 protein. (A) Determination of aniline and phenylhydrazine in AR73 enzymatic  
686 reaction solution by HPLC; (B) Changes of aniline and phenylhydrazine concentrations  
687 in AR73 enzymatic reaction solution with time (mean  $\pm$  SE, n = 3); (C) SDS-PAGE  
688 image of Ord95 point mutant protein; (D) Relative enzyme activity of Ord95 point  
689 mutant protein (mean  $\pm$  SE, n = 3); (E, F) Model constructions of Ord95 protein with  
690 SWISS-MODEL. The green dots are 38R, 54R, 55R mutation sites.



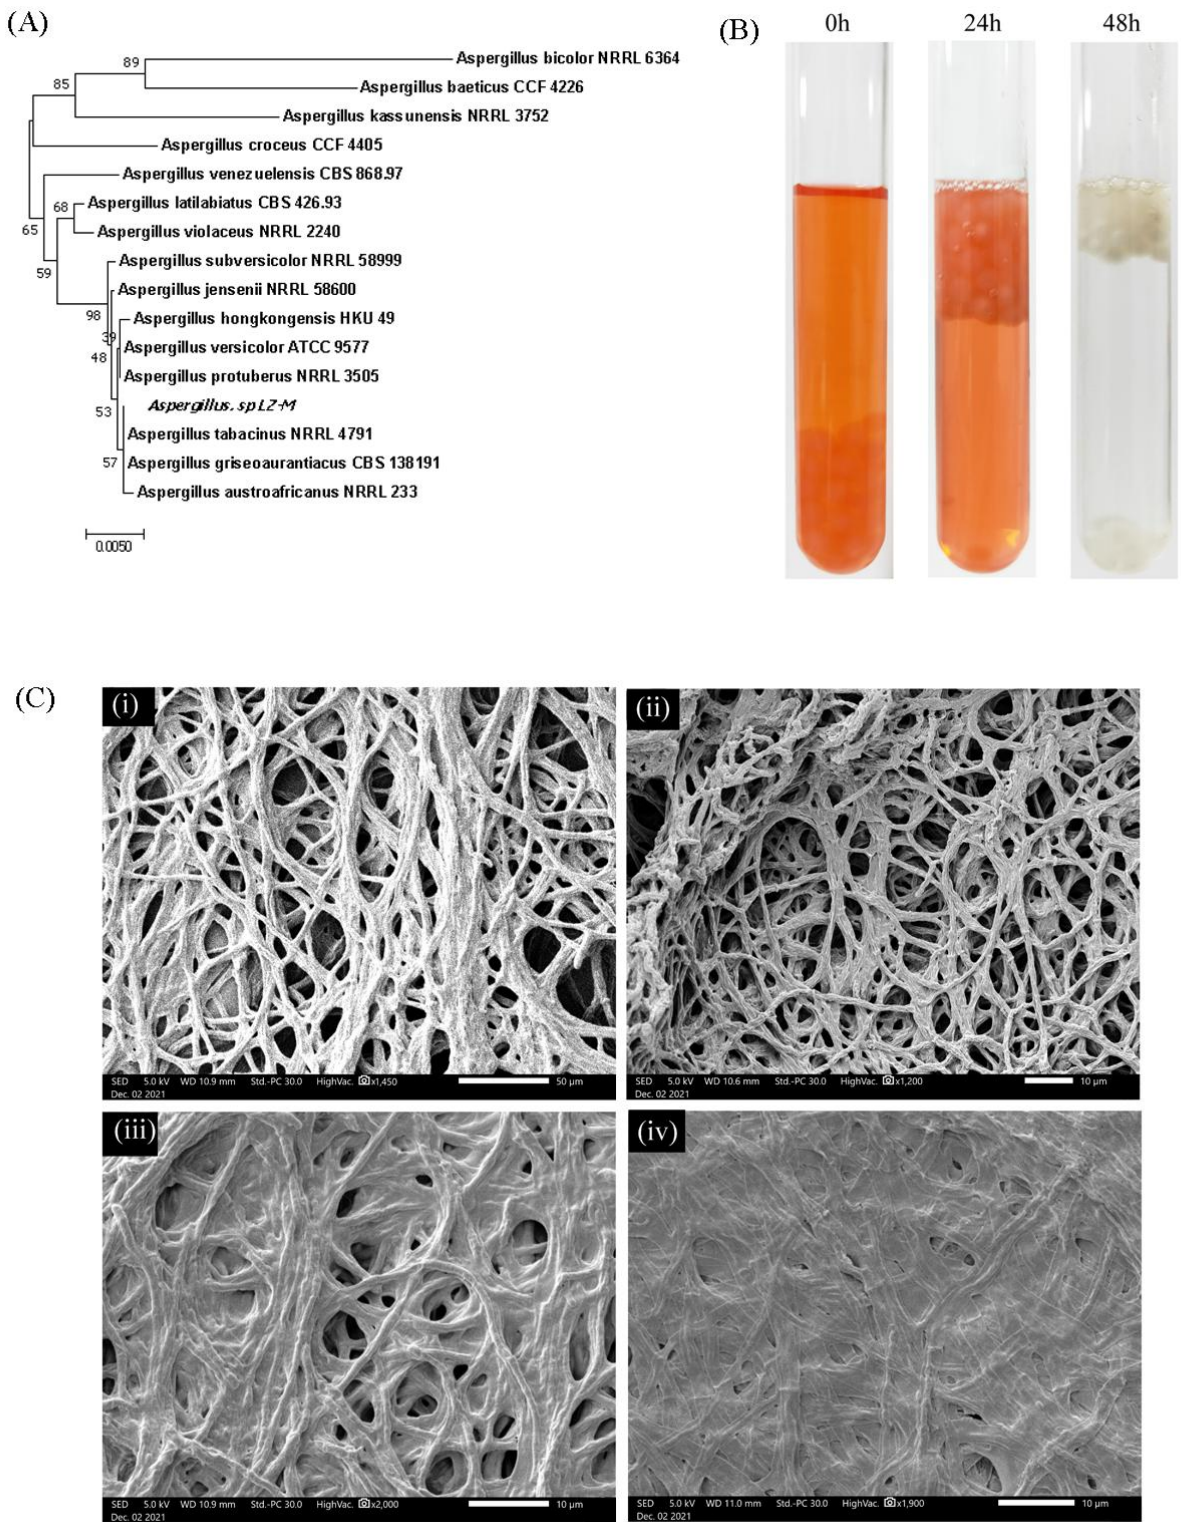

Fig. 1

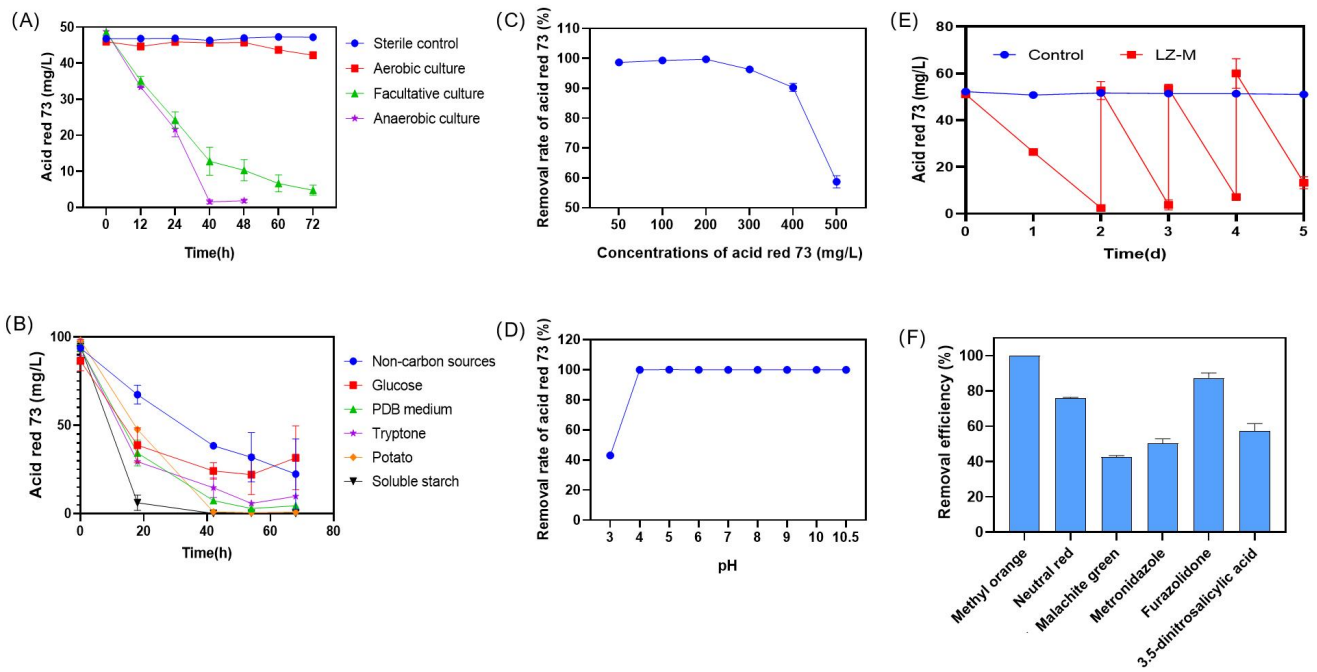

Fig. 2



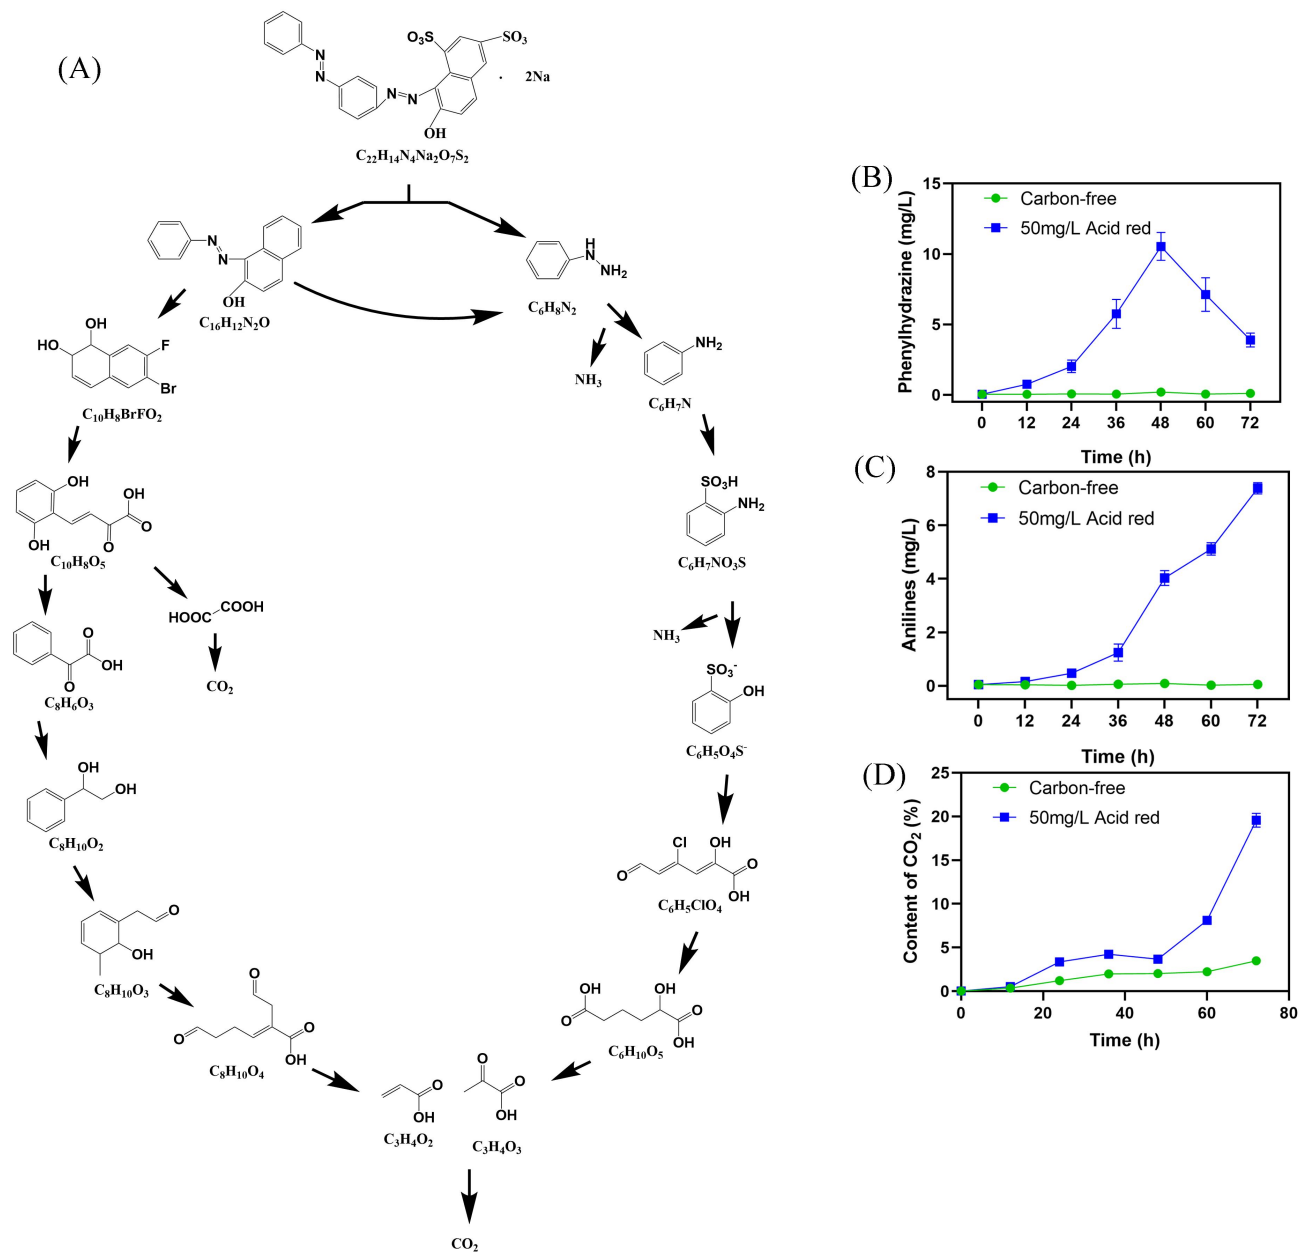

Fig. 3

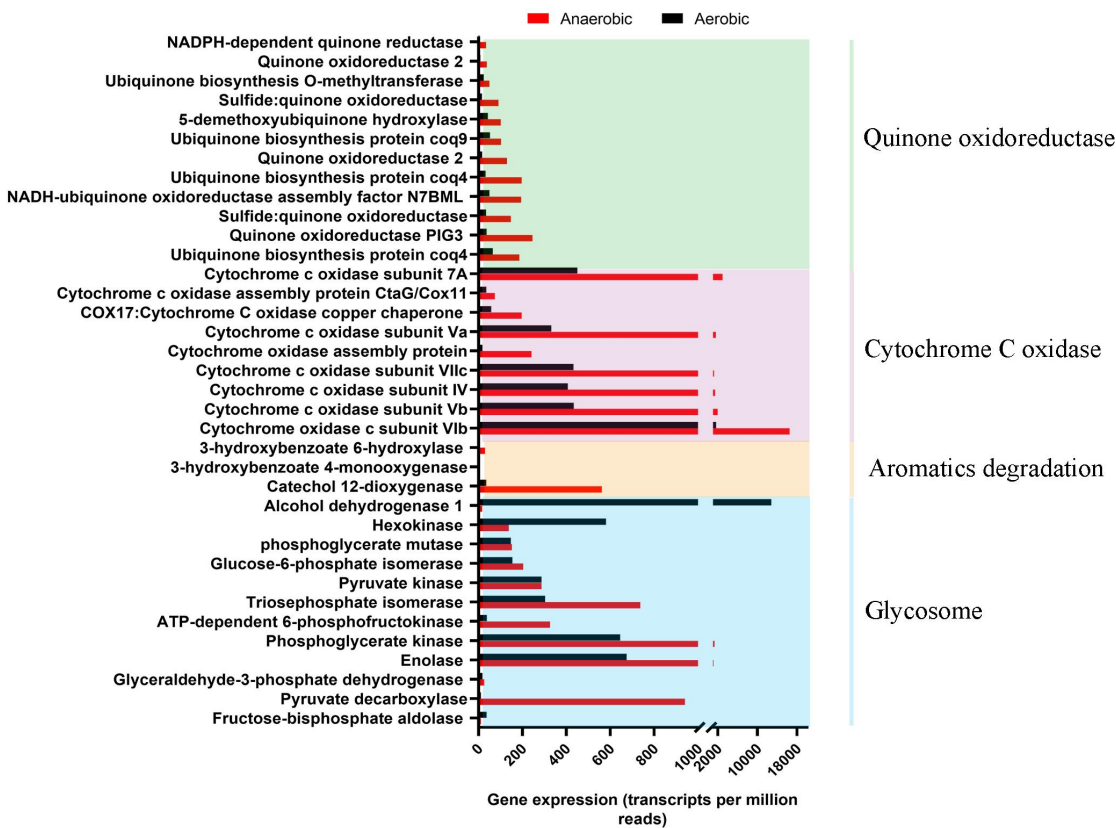

Fig. 4

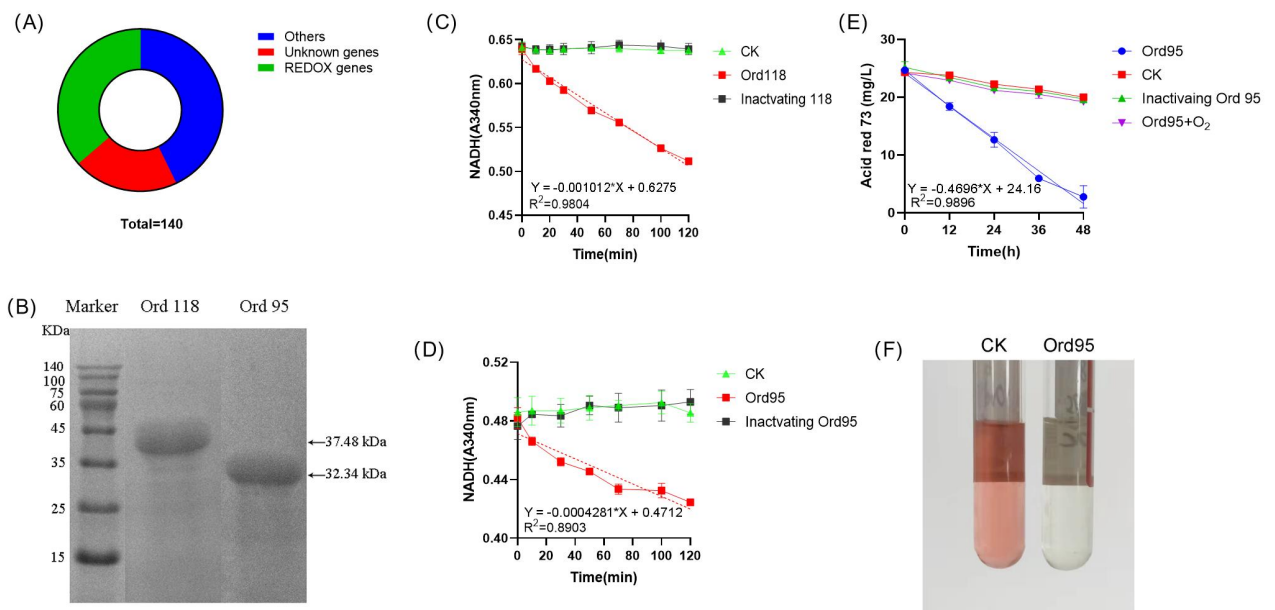

Fig. 5

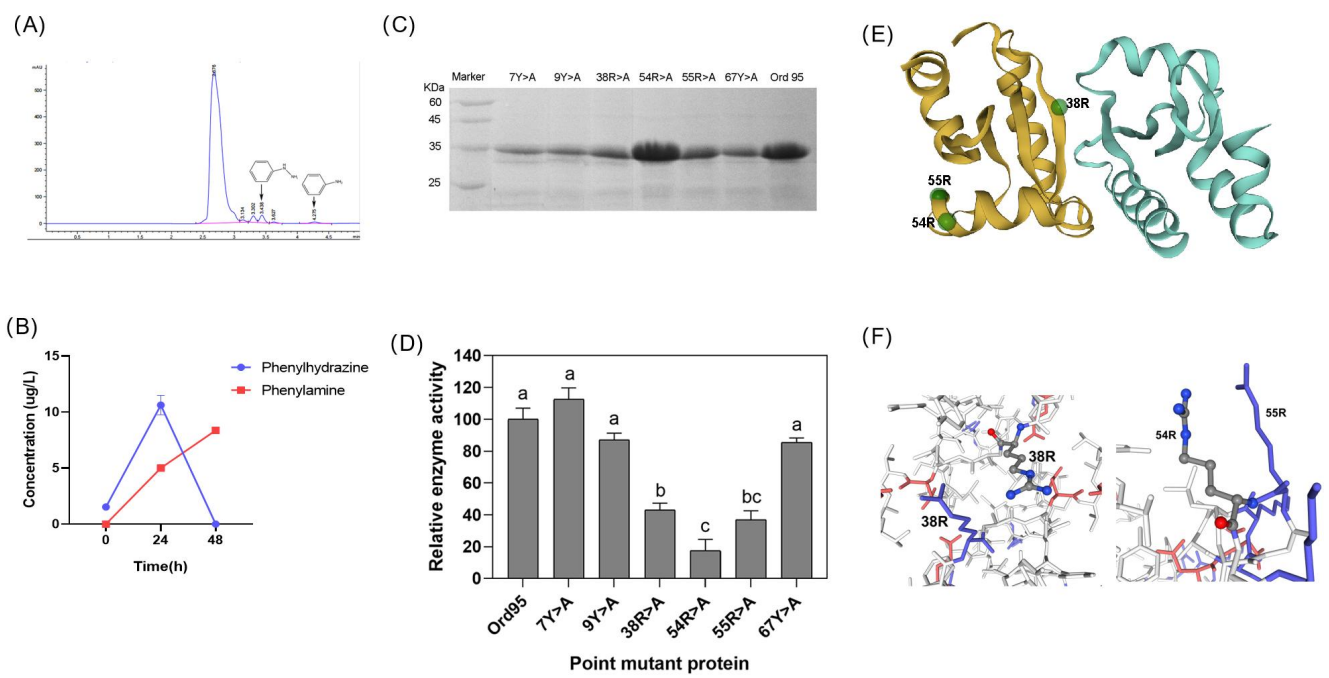

Fig. 6
